# Supplementary material
Source: Elsevier journal article supplement (https://www.sciencedirect.com/science/article/pii/S0213005X21000884)
Supplement: mmc1 [file S0213005X21000884:mmc1.pdf]

**Tabla 1S.** Evolución temporal de la tasa de hospitalización por tosferina por 1.000 personas-año según grupos de edad.

|                 | <b>Total<br/>(0 – 11 meses)</b> | <b>0 – 2 meses</b> | <b>3 – 11 meses</b> |
|-----------------|---------------------------------|--------------------|---------------------|
| <b>Año 2008</b> | 3,15                            | 11,45              | 0,38                |
| <b>Año 2009</b> | 3,29                            | 9,86               | 1,10                |
| <b>Año 2010</b> | 2,92                            | 5,19               | 2,16                |
| <b>Año 2011</b> | 10,78                           | 26,35              | 5,59                |
| <b>Año 2012</b> | 4,86                            | 12,15              | 2,43                |
| <b>Año 2013</b> | 3,35                            | 13,41              | 0                   |
| <b>Año 2014</b> | 3,16                            | 6,90               | 1,92                |
| <b>Año 2015</b> | 3,88                            | 9,55               | 1,99                |
| <b>Año 2016</b> | 2,43                            | 6,09               | 1,22                |
| <b>Año 2017</b> | 2,40                            | 7,19               | 0,80                |
| <b>Año 2018</b> | 0,61                            | 2,46               | 0                   |
| <b>Año 2019</b> | 1,96                            | 6,53               | 0,43                |
